# Supplementary material for: Intestinal microbiota-derived short-chain fatty acids regulation of immune cell IL-22 production and gut immunity
Source: Springer Nature journal article supplement (doi:10.1038/s41467-020-18262-6), 2020-09-08
Supplement: 41467_2020_18262_MOESM1_ESM.pdf [file 41467_2020_18262_MOESM1_ESM.pdf]

**Intestinal microbiota-derived short-chain fatty acids regulation of immune cell IL-22  
production and gut immunity**

Yang et al

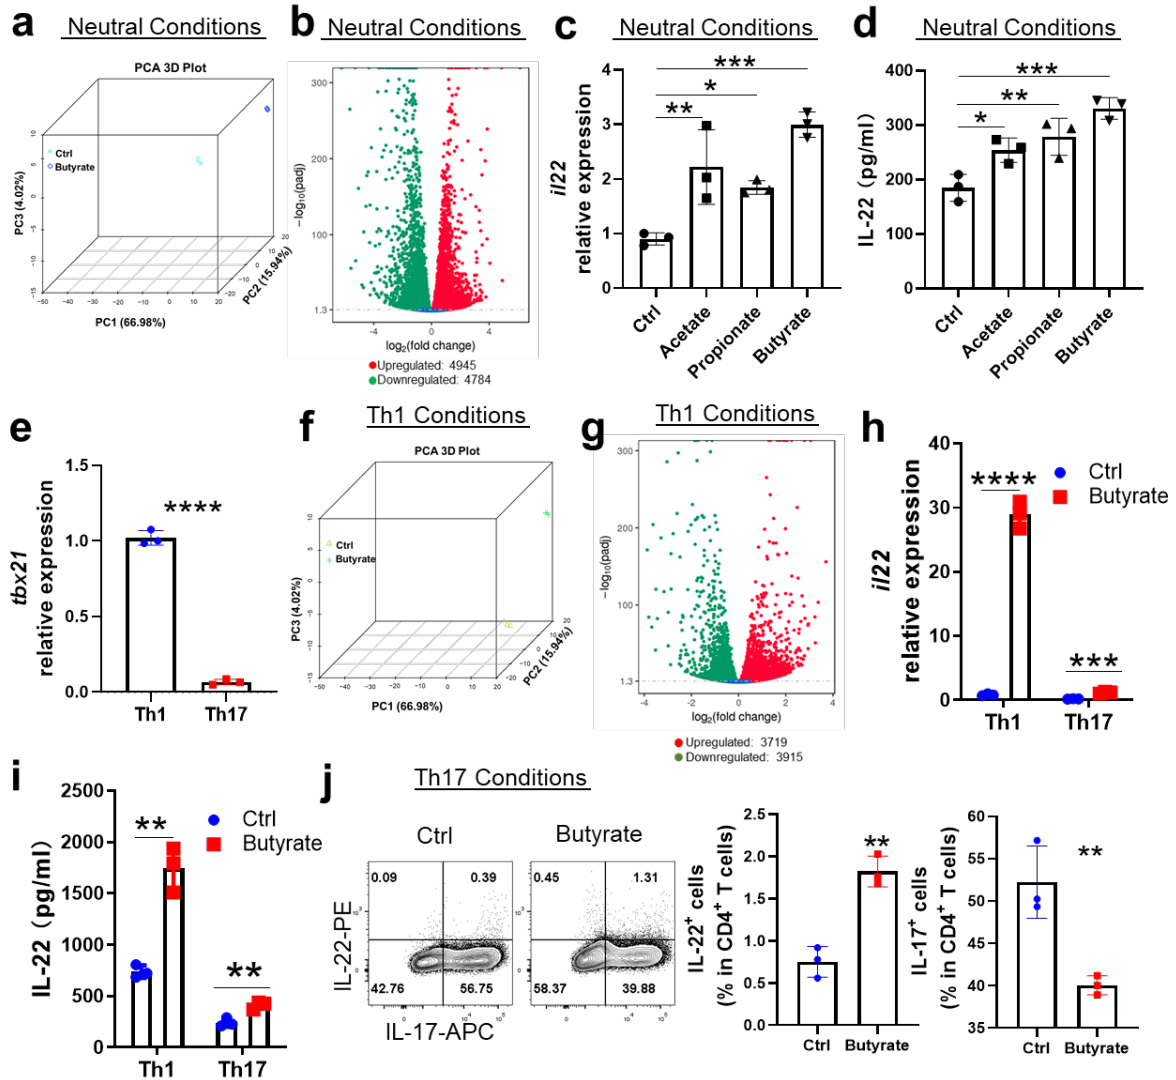

**Supplementary Fig. 1. SCFAs promote CD4<sup>+</sup> T cell IL-22 production.** (a-b) WT splenic CD4<sup>+</sup> T cells were activated with anti-CD3 and anti-CD28 mAb in the presence or absence of butyrate (0.5 mM) for 2 days (n = 3/group). RNA sequencing was performed. Principal components analysis (PCA) plot (a) and Volcano plot (b) of different gene profiles were shown. (c-d) WT splenic CD4<sup>+</sup> T cells were activated with anti-CD3 and anti-CD28 mAb under Th1 conditions with or without acetate (10 mM), propionate (0.5 mM), or butyrate (0.5 mM) for 2 days (n = 3/group). *il22* expression was analyzed by using qRT-PCR (c), and IL-22 in culture supernatants was

analyzed by using ELISA (**d**). (**e**) WT splenic CD4<sup>+</sup> T cells were activated with anti-CD3 and anti-CD28 mAb under Th1 or Th17 conditions (n= 3/group). *Tbx21* expression was assessed by qRT-PCR. (**f-g**) Splenic CD4<sup>+</sup> T cells were activated with anti-CD3 and anti-CD28 mAb under Th1 conditions in the presence or absence of butyrate (0.5 mM) for 2 days (n = 3/ group). RNA sequencing was performed. PCA plot (**f**) and Volcano plot (**g**) of different gene profiles were shown. (**h-i**) CBir1 CD4<sup>+</sup> T cells were activated with APCs and 1 µg/ml CBir1 peptide under Th1 or Th17 conditions with or without butyrate (0.5 mM) for 60 h (n = 3/group). IL-22 mRNA (**h**) and protein (**i**) levels were analyzed by qRT-PCR and ELISA (**h**). (**j**) CBir1 CD4<sup>+</sup> T cells were activated under Th17 conditions with or without butyrate (0.5 mM) for 5 days (n = 3/group). IL-22 production was measured by flow cytometry. One representative of three independent experiments was shown. The data was expressed as mean ± SD. Statistical significance was tested by two-tailed one-way ANOVA (**c-d**) or two-tailed unpaired Student *t* test (**e**, **and h-j**). **c**, \*\**p* = 0.0063, \**p* = 0.0355, \*\*\**p* = 0.0003; **d**, \**p* = 0.0289, \*\**p* = 0.0057, \*\*\**p* = 0.0004; **e**, \*\*\*\**p* < 0.0001; **h**, \*\*\*\**p* < 0.0001, \*\*\**p* = 0.0004; **i**, \*\**p* = 0.0015 (Th1) and 0.0062 (Th17); **j**, middle panel: \*\**p* = 0.0020; right panel: \*\**p* = 0.0088.

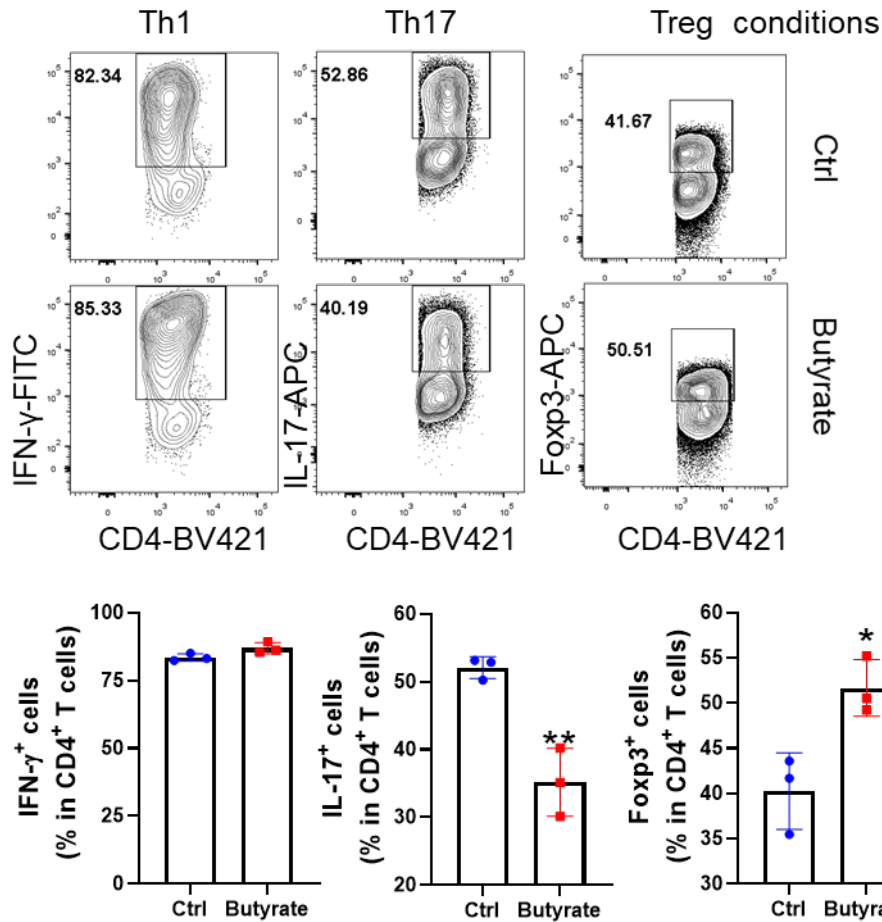

**Supplementary Fig. 2. Butyrate inhibits Th17 cell differentiation but promotes Treg differentiation.** CBir1 CD4<sup>+</sup> T cells were activated with APCs and CBir1 peptide under Th1, Th17, Treg conditions with butyrate (0.5 mM) (n =3/group). IFN $\gamma$ , IL-17, and Foxp3 levels were measured by flow cytometry on day 5. One representative of three independent experiments was shown. The data was expressed as mean  $\pm$  SD. Statistical significance was tested by two-tailed unpaired Student *t* test. \*\**p* = 0.0052; \**p* = 0.0200.

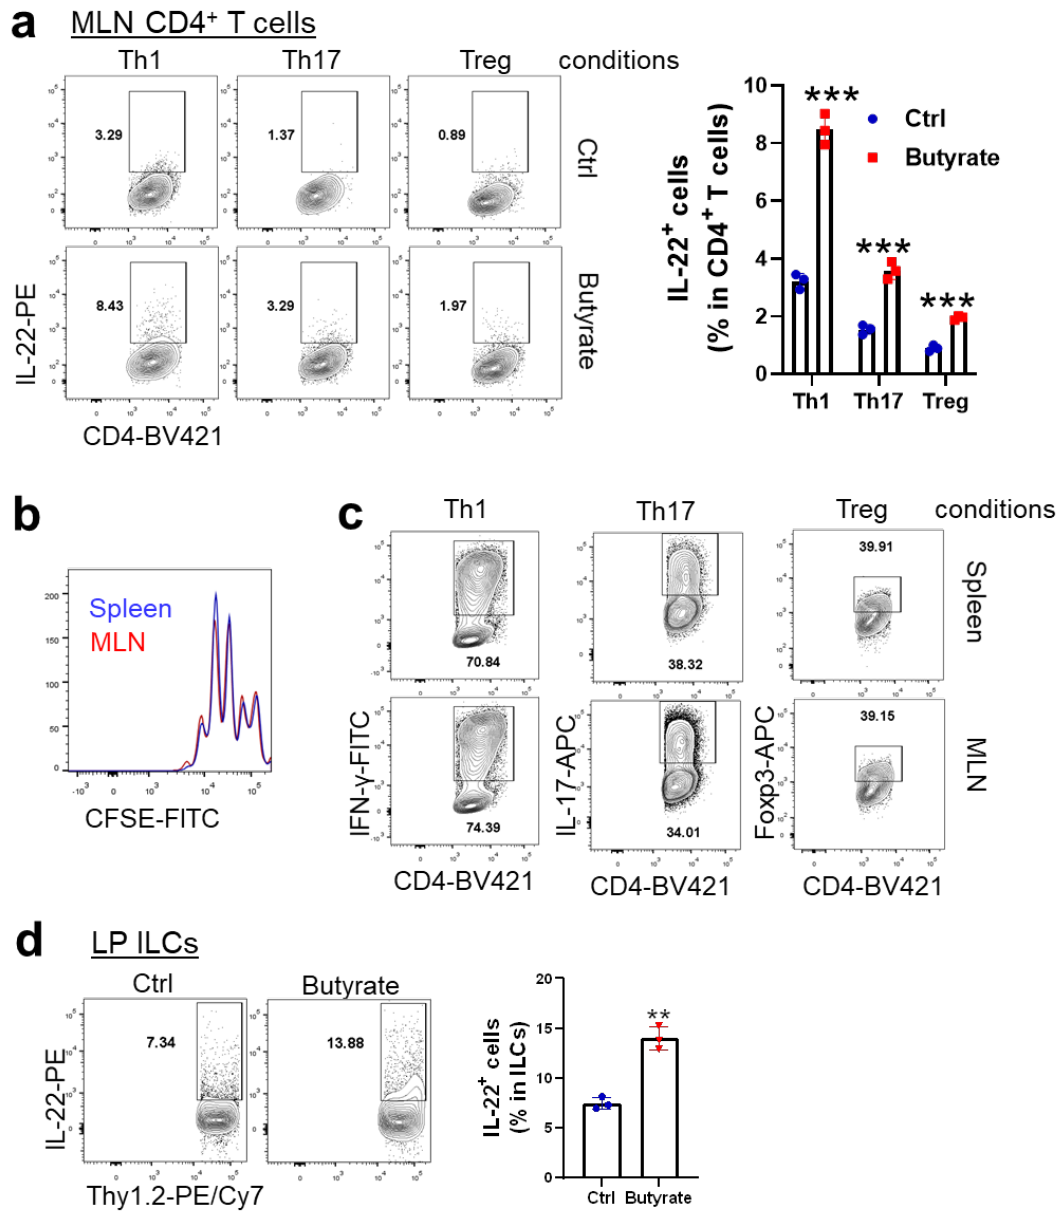

**Supplementary Fig. 3. Butyrate promotes IL-22 production in MLN CD4<sup>+</sup> T cells and intestinal ILCs.** (a) CD4<sup>+</sup> T cells were isolated from MLN of WT mice and activated with anti-CD3 and anti-CD28 mAb in the presence or absence of butyrate (0.5 mM) under Th1, Th17, and Treg conditions. IL-22 production was measured by flow cytometry on day 5. (b) WT splenic and MLN CD4<sup>+</sup> T cells were labeled with CFSE and activated with anti-CD3 and anti-CD28 mAb for

3 days. CFSE dilution was measured by flow cytometry. (c) WT splenic and MLN CD4<sup>+</sup> T cells were activated with anti-CD3 and anti-CD28 mAb in the presence or absence of butyrate (0.5 mM) under Th1, Th17, and Treg conditions for 5 days. Cytokine levels were analyzed by flow cytometry. (d) Intestinal lamina propria cells were treated with IL-23 (20 ng/ml) in the presence or absence of butyrate (0.5 mM) for 16 h (n=3/groups), and IL-22 production in ILCs were analyzed by gating on Linage<sup>-</sup> Thy1<sup>+</sup> population by flow cytometry. One representative of three independent experiments was shown. The data was expressed as mean ± SD. Statistical significance was tested by two-tailed unpaired Student *t* test. **a**, \*\*\**p* = 0.0001 (Th1), 0.0005 (Th17), and 0.0002 (Treg); **d**, \*\**p* = 0.0010.

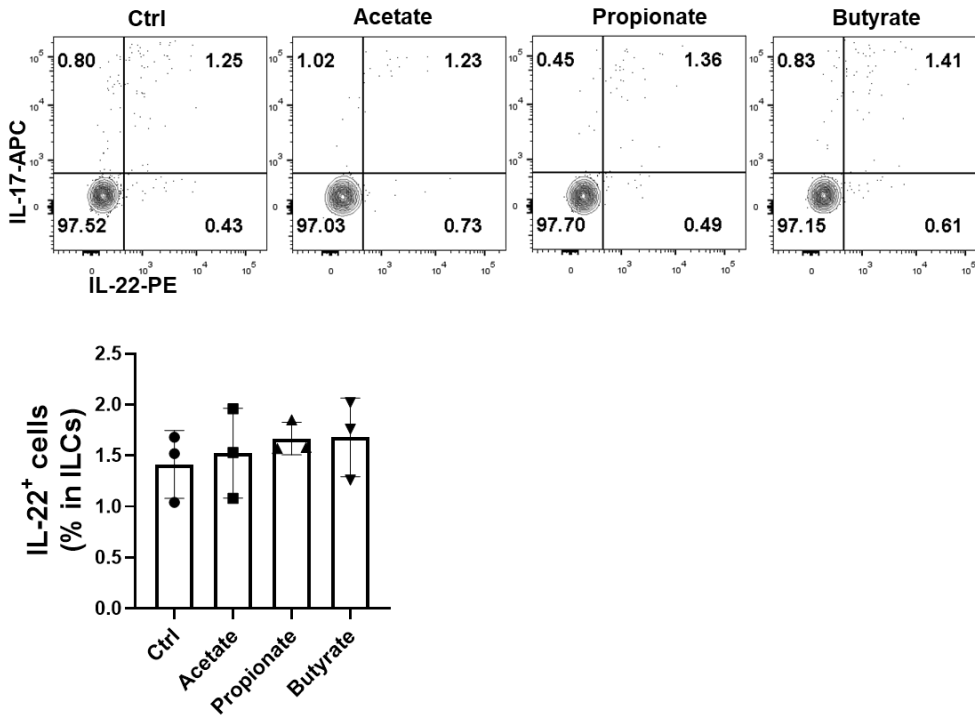

**Supplementary Fig. 4. SCFAs did not affect IL-22 production in ILCs without IL-23 stimulation.** CD4<sup>+</sup> T cell-depleted splenic cells were treated with or without acetate (10 mM), propionate (0.5 mM), or butyrate (0.5 mM) for 16 h (n = 3/groups), and IL-22 and IL-17 production in ILCs were analyzed by gating on Linage<sup>-</sup> Thy1<sup>+</sup> population by flow cytometry. One representative of three independent experiments was shown. The data was expressed as mean ± SD. Statistical significance was tested by two-tailed one-way ANOVA.

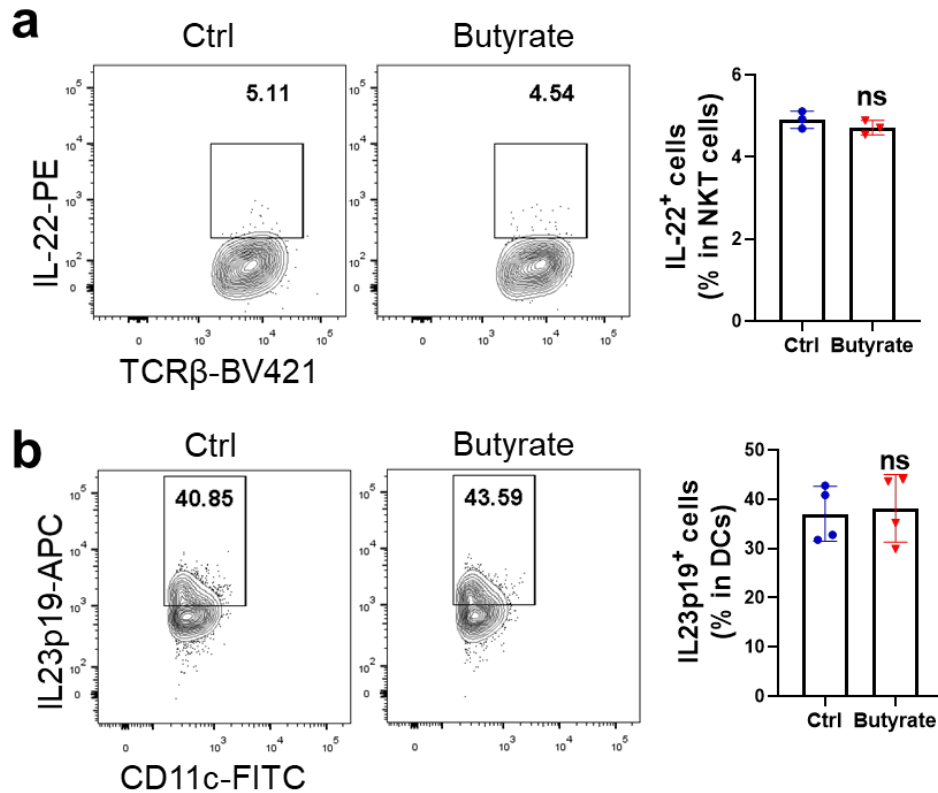

**Supplementary Fig. 5. Butyrate does not affect IL-22 production in NKT cells and IL-23 production in dendritic cells.** (a) Intestinal lamina propria cells were treated with IL-23 (20 ng/ml) in the presence or absence of butyrate (0.5 mM) for 16 h, and IL-22 production was measured by gating on NK1.1<sup>+</sup> cells by flow cytometry. (b) WT mice were treated with or without 200 mM butyrate in drinking water for 3 weeks (n = 4/group). IL-23p19 levels in intestinal dendritic cells (DCs) were measured by flow cytometry. One representative of three independent experiments was shown. The data was expressed as mean ± SD. Statistical significance was tested by two-tailed unpaired Student *t* test.



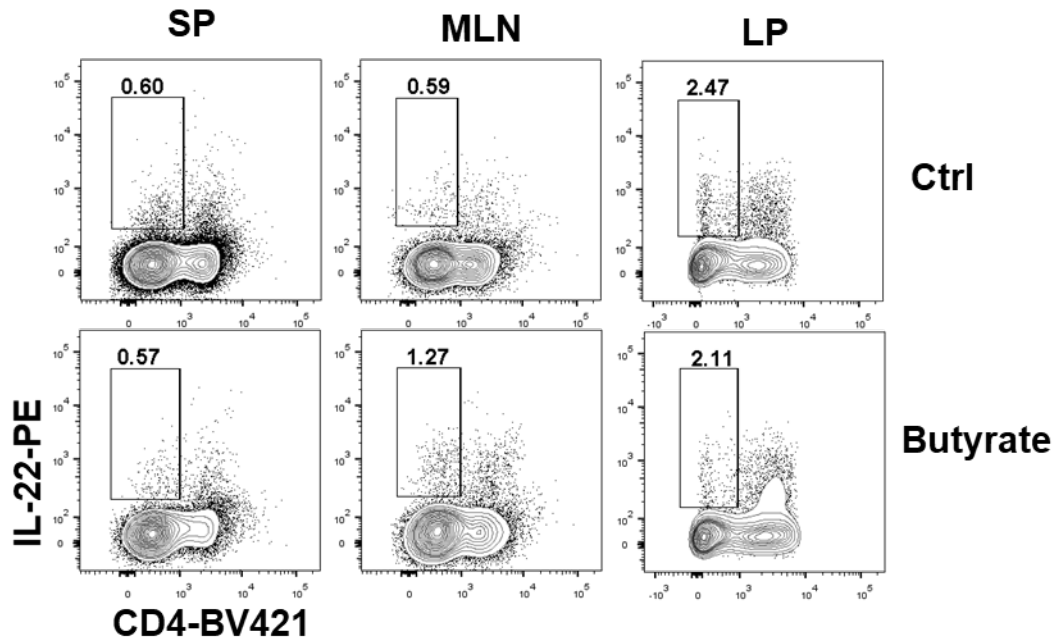

**Supplementary Fig. 6. CD4<sup>+</sup> cells produce IL-22 in spleen, MLN, and intestinal lamina propria.**

WT mice were treated with or without 200 mM butyrate in drinking water for 3 weeks (n = 4/group). Mice were sacrificed on day 21, and IL-22-producing cells in live cells was measured by flow cytometry. One representative of three independent experiments was shown.

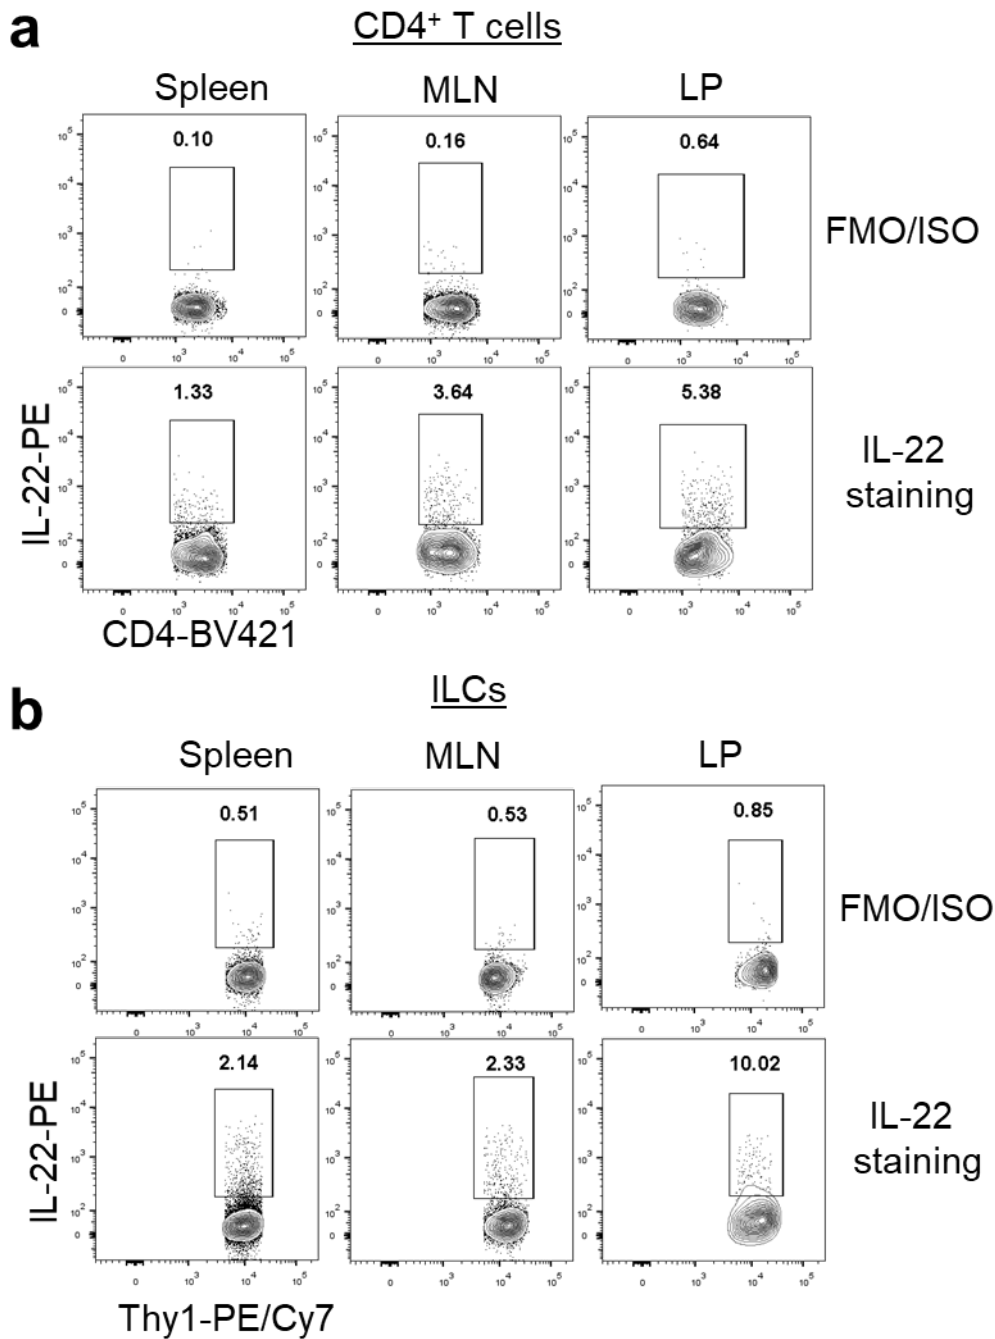

**Figure S7. Fluorescence Minus One/Isotype (FM/ISO) staining.** (a) Cells were isolated from spleen, MLN, and LP, and stimulated with ionomycin and PMA for 2 h, then brefeldin was added for another 3 h. Cells were first incubated with anti-CD16/32 for Fc blocking, and then stained

with Live/dye-APC/Cy7, followed by surface staining with BV421 anti-mouse CD4 antibody. After fixation, cells were stained with anti-IgG Isotype (FMO/ISO) or PE anti-IL-22 (IL-22 staining) antibody. The percentages of IL-22 were assessed by flow cytometry. **(b)** Cells were isolated from spleen, MLN, and LP were stimulated with IL-23 for 16 h, and then activated with ionomycin and PMA for 2 h, followed by adding brefeldin for another 3 h. Cells were first incubated with anti-CD16/32 for Fc blocking, and then stained with Live/dye-APC/Cy7, followed by surface staining with PE/Cy7-anti Thy1 and FITC-lineage (CD3, CD11b, CD11c, B220, NK1.1, and Gr1) antibodies. After fixation, cells were stained with anti-IgG Isotype (FMO/ISO) or PE anti-IL-22 (IL-22 staining) antibody. The percentages of IL-22 were assessed by flow cytometry.

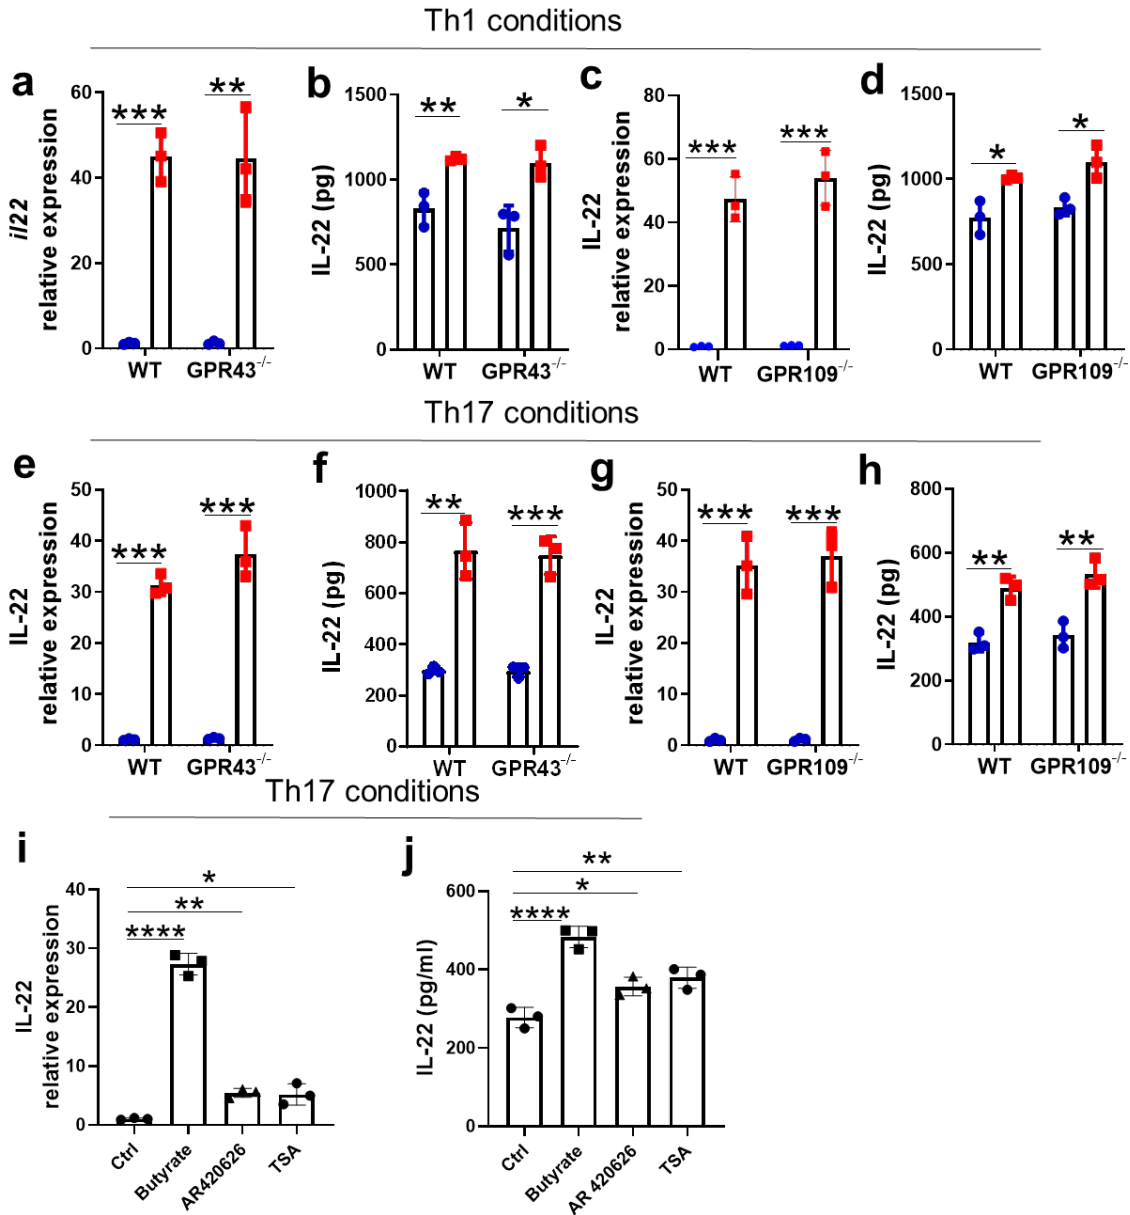

**Supplementary Fig. 8. Butyrate upregulates IL-22 production in CD4<sup>+</sup> T cells through GPR41 and inhibiting HDAC, but not GPR43 and GPR109a.** (a-h) WT, GPR43<sup>-/-</sup>, and GPR109a<sup>-/-</sup> CD4<sup>+</sup> T cells were activated with anti-CD3 and anti-CD28 mAb under Th1 (a-d) or Th17 (e-h) conditions with or without butyrate (0.5 mM) (n=3/group). *Ii22* expression was analyzed by using qRT-PCR (a, c, e, and g) and ELISA (b, d, f, and h). (i-j) CBir1 Tg CD4<sup>+</sup> T

cells were activated with APCs and 1  $\mu\text{g/ml}$  CBir1 peptide with or without butyrate (0.5 mM)  $\pm$  AR420626 (5  $\mu\text{M}$ ) or TSA (10 mM) under Th17 conditions for 60 h (n=3/group). IL-22 mRNA (i) and protein (j) were measured by qRT-PCR and ELISA. One representative of three independent experiments was shown. The data was expressed as mean  $\pm$  SD. Statistical significance was tested by two-tailed unpaired Student *t* test (a-h) or two-tailed one-way ANOVA (i-j). **a**, \*\*\**p* = 0.0002, \*\**p* = 0.0025; **b**, \*\**p* = 0.0075, \**p* = 0.0153; **c**, \*\*\**p* = 0.0003 (WT) and 0.0005 (GPR109<sup>-/-</sup>); **d**, \**p* = 0.0156 (WT) and 0.0137 (GPR109<sup>-/-</sup>); **e**, \*\*\*\**p* < 0.0001, \*\*\**p* = 0.0003; **f**, \*\**p* = 0.0019, \*\*\**p* = 0.0005; **g**, \*\*\**p* = 0.0005 (WT) and 0.0003 (GPR109<sup>-/-</sup>); **h**, \*\**p* = 0.0029 (WT) and 0.0054 (GPR109<sup>-/-</sup>); **i**, \*\*\*\**p* < 0.0001, \*\**p* = 0.0097, \**p* = 0.0133; **j**, \*\*\*\**p* < 0.0001, \**p* = 0.0145, \*\**p* = 0.0036.

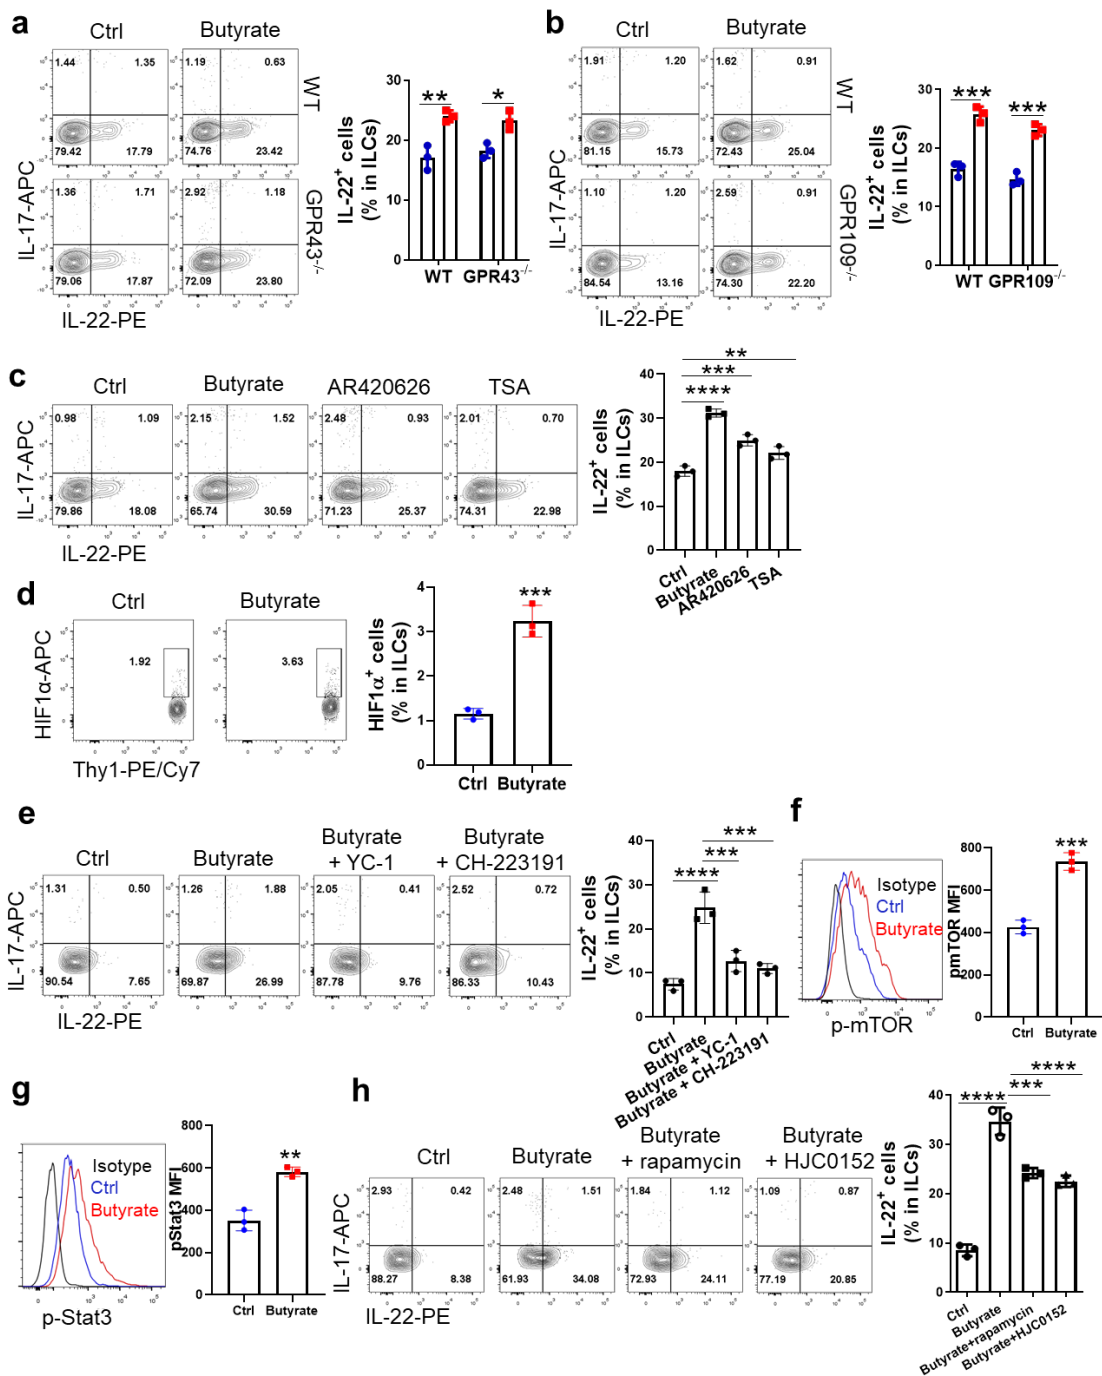

**Supplementary Fig. 9. Butyrate promotes IL-22 production in ILCs.** (a-b) CD4<sup>+</sup> T cell-depleted splenic cells from WT, *Gpr43*<sup>-/-</sup> (a), or *Gpr109* $\alpha$ <sup>-/-</sup> mice (b) were stimulated with IL-23 (20 ng/ml) in the presence or absence of butyrate (0.5 mM) for 16 h (n=3/group). IL-22 production

in ILCs were analyzed by flow cytometry. **(c)** CD4<sup>+</sup> T cell-depleted splenic cells were stimulated with IL-23 (20 ng/ml) with or without butyrate (0.5 mM) in the presence or absence of AR420626 (5 μM) or TSA (10 mM) for 16 h (n = 3/group). IL-22 production in ILCs was analyzed by flow cytometry. **(d)** CD4<sup>+</sup> T cell-depleted splenic cells were stimulated with IL-23 (20 ng/ml) in the presence or absence of butyrate (0.5 mM) for 16 h (n = 3/group). HIF1α in ILCs (Lineage<sup>-</sup> Thy1<sup>+</sup>) were analyzed by flow cytometry. **(e)** CD4<sup>+</sup> T cell-depleted splenic cells were stimulated with IL-23 (20 ng/ml) with or without butyrate (0.5 mM) in the presence or absence of YC-1 (5 μM) or CH-223191 (3 μM) for 16 h (n = 3/group). IL-22 production in ILCs were analyzed by flow cytometry. **(f-g)** CD4<sup>+</sup> T cell-depleted splenic cells were stimulated with IL-23 (20 ng/ml) in the presence or absence of butyrate (0.5 mM) for 2 h (n=3/group). pmTOR **(f)** and pStat3 **(g)** levels were measured by flow cytometry. **(h)** CD4<sup>+</sup> T cell-depleted splenic cells were stimulated with IL-23 (20 ng/ml) with or without butyrate (0.5 mM) in the presence or absence of rapamycin (1 μM) or HJC0152 (1 μM) for 16 h (n=3/group). IL-22 production in ILCs was analyzed by flow cytometry. The data was expressed as mean ± SD. The data was expressed as mean ± SD. Statistical significance was tested by two-tailed unpaired Student *t* test **(a-b, d, and f-g)** or two-tailed one-way ANOVA **(c, e, and h)**. **a**, \*\**p* = 0.0061, \**p* = 0.0129; **b**, \*\*\**p* = 0.0009 (WT) and 0.0006 (GPR109<sup>-/-</sup>); **c**, \*\*\*\**p* < 0.0001, \*\*\**p* = 0,0003, \*\**p* = 0.0082; **d**, \*\*\**p* = 0.0006; **e**, \*\*\*\**p* < 0.0001, \*\*\**p* = 0.0006 (butyrate + YC-1 vs butyrate) and 0.0002 (butyrate + CH-223191 vs butyrate); **f**, \*\*\**p* = 0.0005; **g**, \*\**p* = 0.0018; **h**, \*\*\*\**p* < 0.0001, \*\*\**p* = 0.0002.

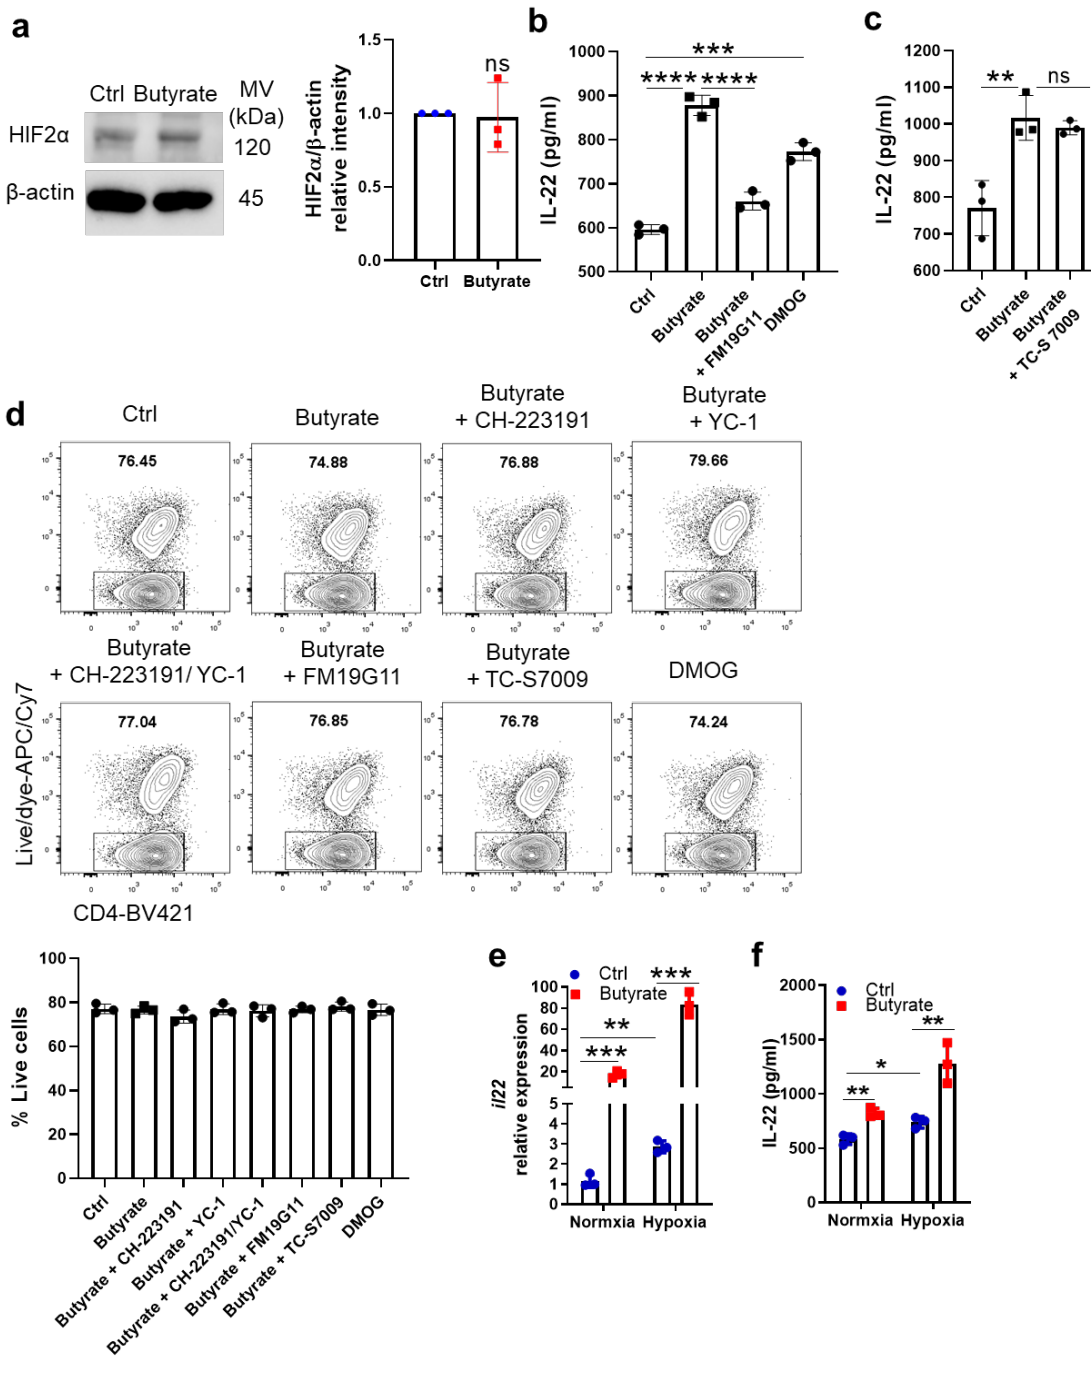

**Supplementary Fig. 10. Butyrate promotes IL-22 production through HIF1α but not HIF2α.**

(a) WT CD4<sup>+</sup> T cells were activated with anti-CD3 and anti-CD28 mAb under Th1 conditions with or without butyrate (0.5 mM) for 2 days (n=3/group), and HIF2α protein was analyzed by



western blot (ns, no significance). **(b)** CBir1 Tg CD4<sup>+</sup>T cells were activated with APCs and 1 µg/ml CBir1 peptide under Th1 condition with butyrate (0.5 mM) ± FM19G11 (500 nM), or DMOG (100 µM) for 60 h (n=3/group). IL-22 expression was measured by ELISA. **(c)** CBir1 Tg CD4<sup>+</sup>T cells were activated with APCs and 1 µg/ml CBir1 peptide under Th1 conditions with butyrate (0.5 mM) ± TC-S 7009 (50 µM) for 60 h (n=3/group). IL-22 expression was measured by ELISA. **(d)** CBir1 Tg CD4<sup>+</sup>T cells were activated with APCs and 1 µg/ml CBir1 peptide under Th1 conditions with butyrate (0.5 mM) in the presence of different inhibitor and agonist for 5 days, and cell viability was assessed by live cells using Live/dye staining. **(e-f)** CD4<sup>+</sup> T cells were activated with anti-CD3 and anti-CD28 mAb treated under Th1 conditions with or without butyrate (0.5 mM) under normoxic or hypoxic (3 % O<sub>2</sub>) conditions for 60 h (n = 3/group). IL-22 mRNA **(e)** and protein **(f)** were measured by qRT-PCR and ELISA. One representative of three independent experiments was shown. The data was expressed as mean ± SD. Statistical significance was tested by two-tailed unpaired Student *t* test (**a, e, and f**) or two-tailed one-way ANOVA (**b-d**). **b**, \*\*\*\**p* < 0.001, \*\*\**p* = 0.0004; **c**, \*\**p* = 0.0033, ns, no significance; **e**, \*\*\**p* = 0.0001 (normoxia) and 0.0002 (hypoxia), \*\**p* = 0.0027; **f**, \*\**p* = 0.0032 (normoxia) and 0.0085 (hypoxia), \**p* = 0.0193.

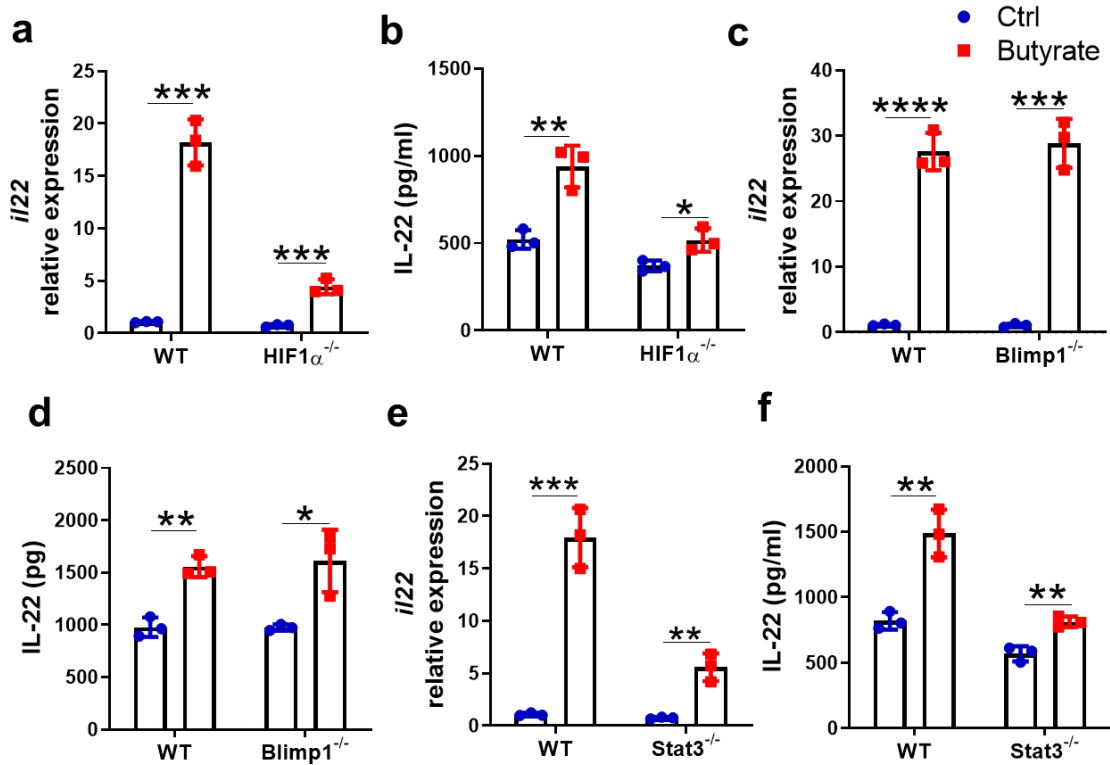

**Supplementary Fig. 11. Butyrate promotes CD4<sup>+</sup> T cell IL-22 production through HIF1 $\alpha$  and Stat3, but not Blimp1.** WT, HIF1 $\alpha$ -deficient, Blimp1-deficient, and Stat3-deficient CD4<sup>+</sup> T cells were activated with anti-CD3 and anti-CD28 mAb under Th1 condition with or without butyrate (0.5 mM) (n=3/group). IL-22 expression was analyzed by using qRT-PCR (**a**, **c**, and **e**) and ELISA (**b**, **d**, and **f**). One representative of three independent experiments was shown. The data was expressed as mean  $\pm$  SD. Statistical significance was tested by two-tailed unpaired Student *t* test. **a**, \*\*\**p* = 0.0002 and 0.0008; **b**, \*\**p* = 0.0052, \**p* = 0.0256; **c**, \*\*\*\**p* < 0.0001, \*\*\**p* = 0.0002; **d**, \*\**p* = 0.0018, \**p* = 0.0211; **e**, \*\*\**p* = 0.0005, \*\**p* = 0.0032; **f**, \*\**p* = 0.0039.

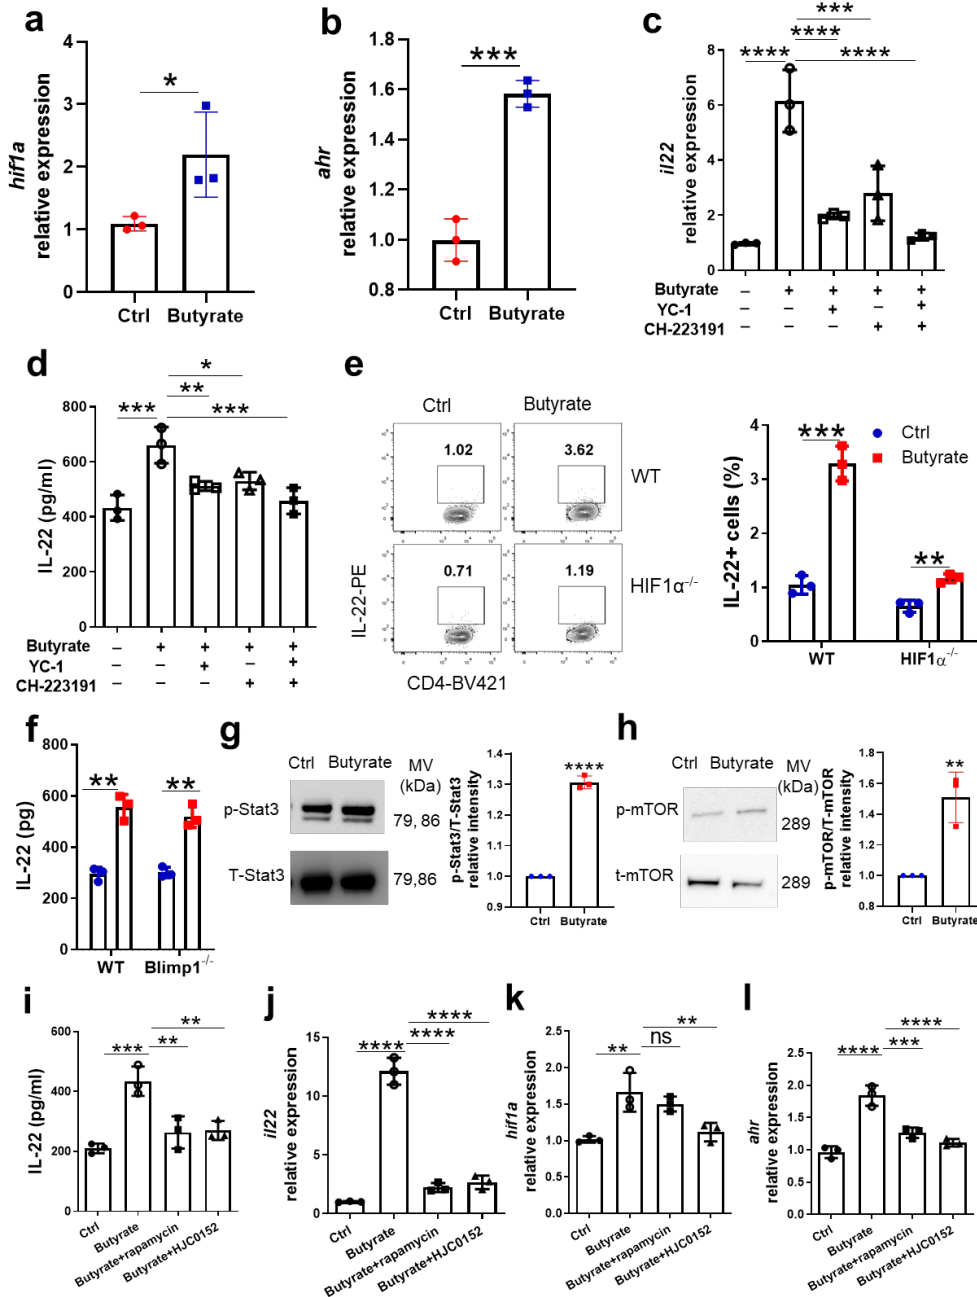

**Supplementary Fig. 12. Butyrate induces HIF1 $\alpha$  and AhR to promote IL-22 expression through mTOR and Stat3 pathways under Th17 conditions.** (A-B) CBir1 CD4 $^{+}$  T cells were activated with APCs and 1  $\mu$ g/ml Cbir1 peptide under Th17 conditions with or without butyrate (0.5 mM) (n=3/group). Expression of *Hif1a* (a) and *Ahr* (b) was analyzed by using qRT-PCR. (c-

**d)** CBir1 CD4<sup>+</sup> T cells were activated with APCs and 1 µg/ml Cbir1 peptide under Th17 conditions with butyrate (0.5 mM) in the presence or absence of YC-1 (5 µM) or/and CH-223191 (3 µM) for 60 h (n=3/group). IL-22 mRNA (**c**) and protein (**d**) levels were measured by qRT-PCR and ELISA. (**e**) WT and HIF-1α-deficient CD4<sup>+</sup> T cells were activated with anti-CD3 and anti-CD28 mAb in the presence or absence of butyrate (0.5 mM) for 5 days (n = 3/group). IL-22 production was assessed by flow cytometry. (**f**) WT and Blimp1-deficient CD4<sup>+</sup> T cells were activated with anti-CD3 and anti-CD28 under Th17 condition in the presence or absence of butyrate (0.5 mM) (n=3/group). IL-22 production was analyzed by using ELISA at 60 h. (**g-h**) WT splenic CD4<sup>+</sup> T cells were activated with anti-CD3 and anti-CD28 mAb under Th17 condition in the presence or absence of butyrate (0.5 mM). Phosphorylated Stat3 was analyzed by western blot at 12 h (**g**), and phosphorylated mTOR at 24 h (**h**). (**i-l**) CBir1 CD4<sup>+</sup> T cells were activated with APCs and 1 µg/ml Cbir1 peptide under Th17 condition with butyrate (0.5 mM) in the presence or absence of rapamycin (1 µM) or HJC0152 (1 µM) (n = 3/group). IL-22 mRNA (**i**) and protein (**j**) levels were assessed by qRT-PCR and ELISA at 60 h. Expression of *Hif1a* (**k**) and *Ahr* (**l**) was analyzed at 2 days by qRT-PCR. One representative of three independent experiments was shown. The data was expressed as mean ± SD. Statistical significance was tested by two-tailed unpaired Student *t* test (**a-b, and e-h**) or two-tailed one-way ANOVA (**c-d, and i-l**). **a**, \**p* = 0.0499; **b**, \*\*\**p* = 0.0005; **c**, \*\*\*\**p* < 0.0001, \*\*\**p* = 0.0004; **d**, \*\*\**p* = 0.0004 (butyrate vs control) and 0.0009 (butyrate + YC-1 + CH-223191 vs butyrate); **e**, (\*\*\*)*p* = 0.0004, (\*\*)*p* = 0.0029; **f**, \**p* = 0.0012 (WT) and 0.0013 (Blimp1<sup>-/-</sup>); **g**, \*\*\*\**p* < 0.0001; **h**, \*\**p* = 0.0059; **i**, \*\*\**p* = 0.0004, \*\**p* = 0.0022 (butyrate + rapamycin vs butyrate) and 0.0028 (butyrate + HJC0152 vs butyrate); **j**, \*\*\*\**p* < 0.0001; **k**, \*\**p* = 0.0074 (butyrate vs control) and 0.0027 (butyrate + HJC0152 vs butyrate), ns, no significance; **l**, \*\*\*\**p* < 0.0001, \*\*\**p* = 0.0004;

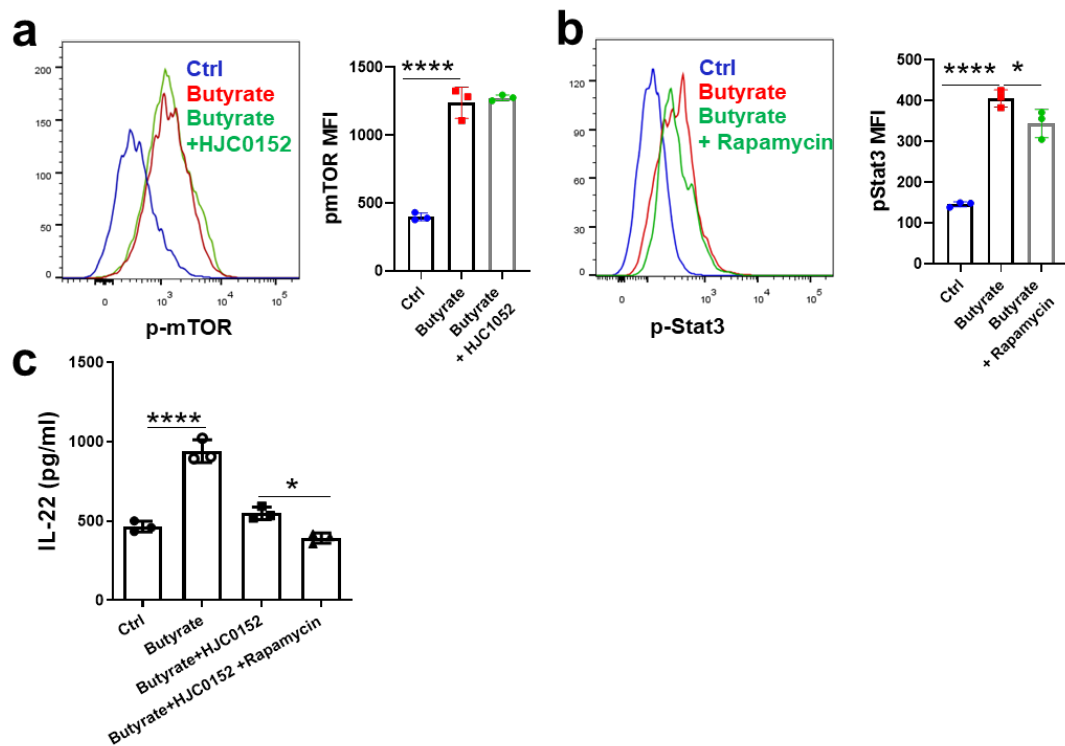

**Supplementary Fig. 13. Rapamycin moderately suppresses Stat3 activation induced by butyrate.** (a) WT CD4<sup>+</sup> T cells were activated with anti-CD3 and anti-CD28 mAb under Th1 conditions with or without butyrate (0.5 mM) in the presence or absence of HJC0152 (1  $\mu$ M), and phosphorylated mTOR (24 h) were assessed by flow cytometry. (b) CD4<sup>+</sup> T cells were activated with anti-CD3 and anti-CD28 mAb under Th1 conditions with or without butyrate (0.5 mM) in the presence or absence of rapamycin (1  $\mu$ M), and Phosphorylated Stat3 (6 h) were assessed by flow cytometry. (c) CD4<sup>+</sup> T cells were activated under Th1 conditions with butyrate (0.5 mM) in the presence or absence of HJC0152 (1  $\mu$ M)  $\pm$  rapamycin (1  $\mu$ M) (n=3/group). IL-22 levels were assessed by ELISA at 60 h. One representative of three independent experiments was shown. The data was expressed as mean  $\pm$  SD. Statistical significance was tested by two-tailed one-way ANOVA. **a**, \*\*\*\* $p$  < 0.0001; **b**, \*\*\*\* $p$  < 0.0001, \* $p$  = 0.0332; **c**, \*\*\*\* $p$  < 0.0001, \* $p$  = 0.0148.

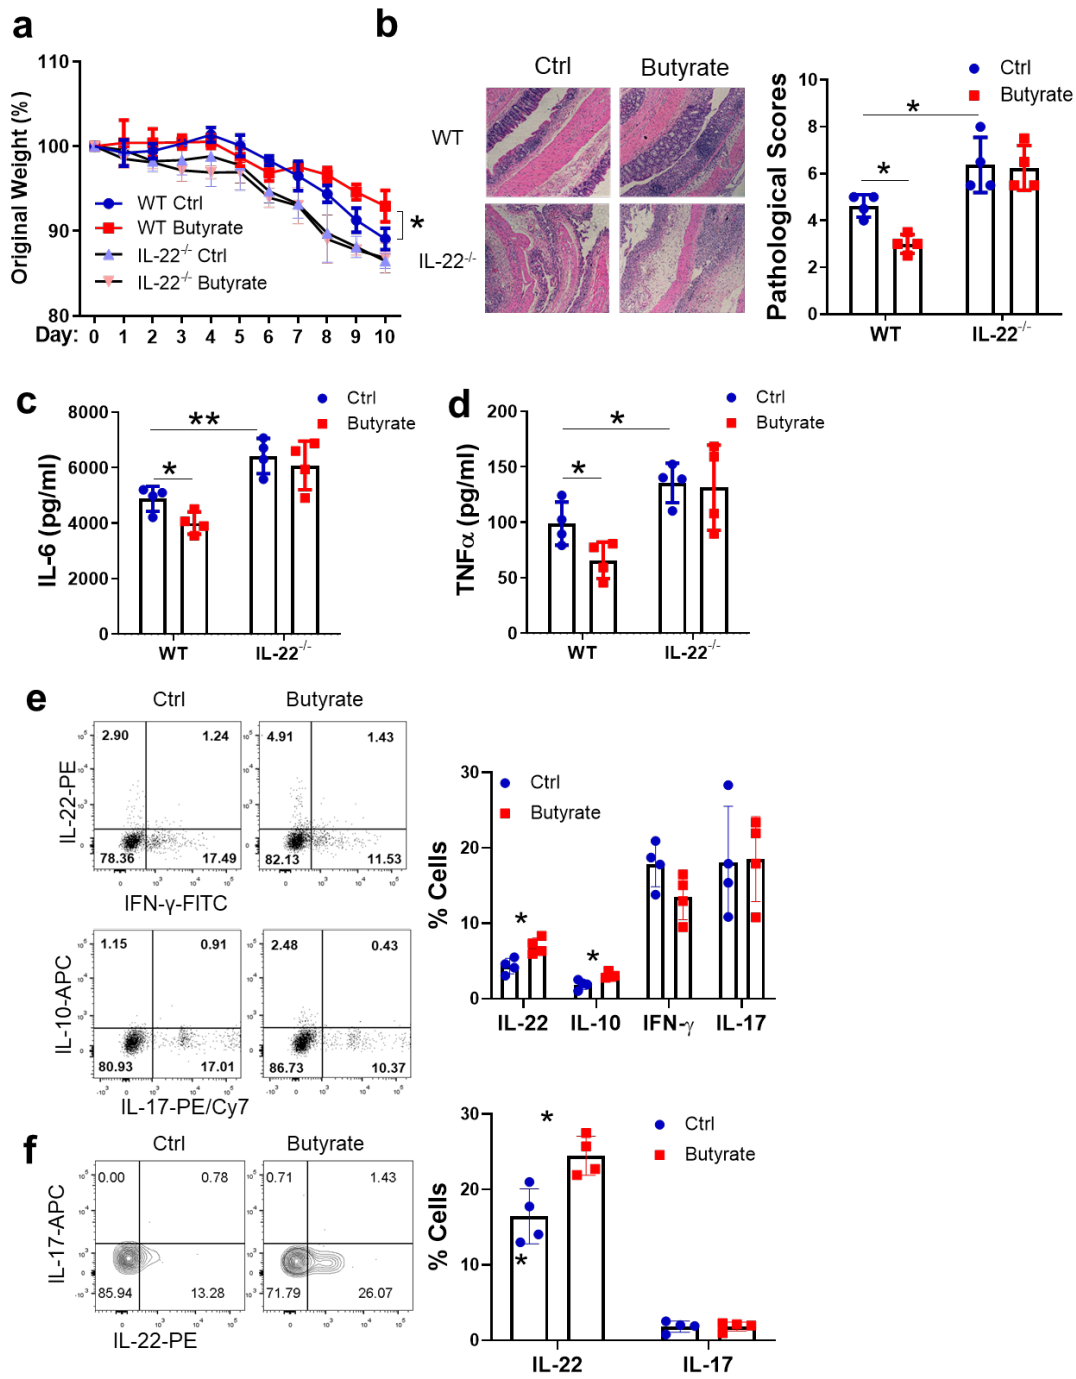

**Supplementary Fig. 14. Butyrate ameliorates DSS-induced colitis through promoting IL-22 production.** WT and *Il22*<sup>-/-</sup> mice were administrated with DSS in the presence or absence of butyrate (200 mM) in drinking water for 7 days, followed by drinking water with or without

butyrate for another 3 days (n=4 mice/group). Mice were weighed daily (**a**), and colonic histopathology and pathology score (**b**), colonic IL-6 (**c**), and TNF- $\alpha$  (**d**) production in colonic organ culture were determined at day 10. IL-22<sup>+</sup>, IL-10<sup>+</sup>, IFN- $\gamma$ <sup>+</sup>, and IL-17<sup>+</sup> CD4<sup>+</sup> T cells (**e**), and IL-22<sup>+</sup> and IL-17<sup>+</sup> ILCs (Lineage<sup>-</sup> Thy1<sup>+</sup>) (**f**) (\**p* = 0.0116) in LP of WT mice were determined at day 10. One representative of three independent experiments was shown. The data was expressed as mean  $\pm$  SD. Statistical significance was tested by two-tailed unpaired Student *t* test (**a**, **c-f**) or the nonparametric two-tailed Mann-Whitney U test (**b**). **a**, \**p* = 0.0139; **b**, \**p* = 0.0286; **c**, \**p* = 0.0280, \*\**p* = 0.0075; **d**, \**p* = 0.0400 (WT butyrate vs WT control) and 0.0322 (IL-22<sup>-/-</sup> control vs WT control); **e**, \**p* = 0.0115 (IL-22) and 0.0170 (IL-10).

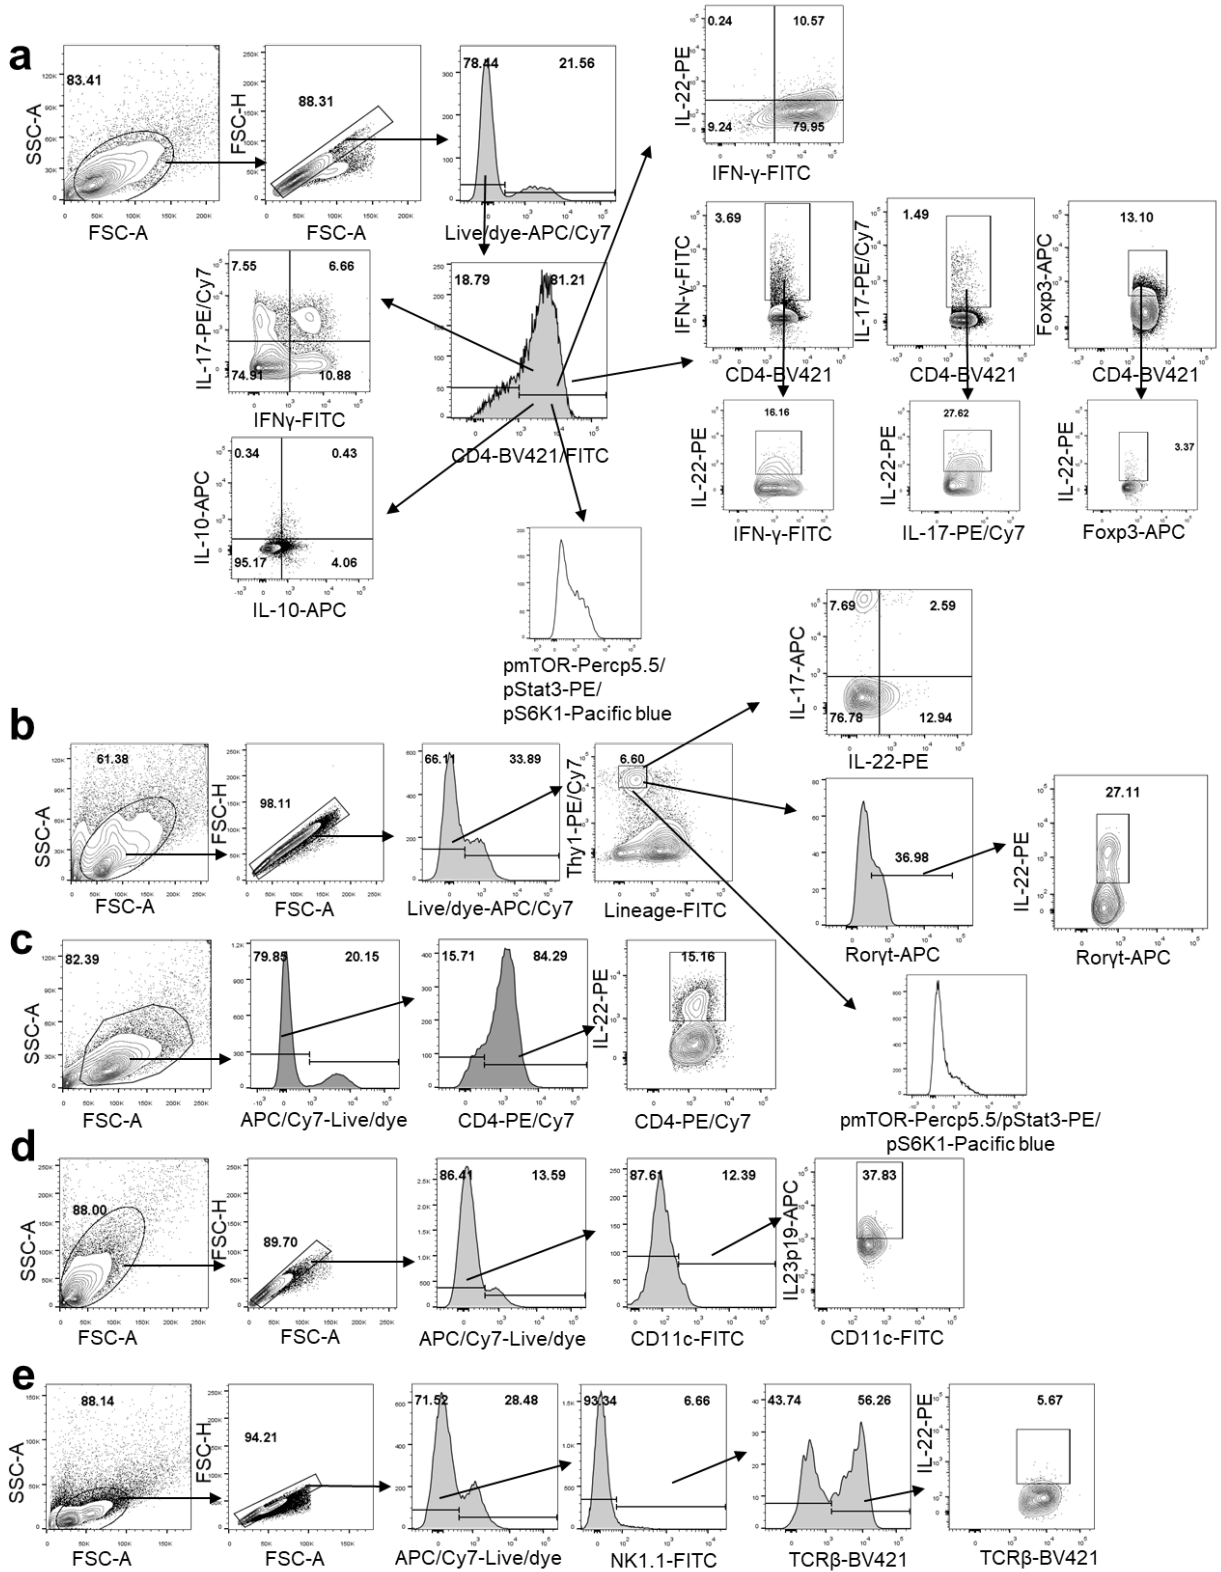



**Supplementary Fig. 15. Flow cytometry gating strategies.** (a) Gating strategies for mouse CD4<sup>+</sup> T cells used in Fig. 1h, 2e, 2f, 3c, 4j-k, 5b, 5d, 5e-j, 7c, Supplementary Fig. 1j, 2, 3a-c, 6, 7a, 10d, 12e, 13a-b, and 14e. (b) Gating strategies for ILCs used in Fig. 1i, 2g, 2h, 7d, Supplementary Fig. 3d, 4, 7b, 9, and 14f. (c) Gating strategies for human CD4<sup>+</sup> T cells used in Fig. 9b and 9f. (d) Gating strategies for mouse DCs used in Supplementary Fig. 5b. (e) Gating strategies for mouse NKT cells used in Supplementary Fig. 5B.

**Supplementary Table 1. Clinical characteristics of patients with active Crohn's diseases (CD),  
Ulcerative colitis (UC) and healthy donors.**

|                                  | <b>HC</b>  | <b>CD</b>   | <b>UC</b>   |
|----------------------------------|------------|-------------|-------------|
| <b>Number</b>                    | 8          | 10          | 7           |
| <b>Age (years)</b>               | 27.03±6.27 | 28.91±10.18 | 38.13±13.66 |
| <b>Gender</b>                    |            |             |             |
| Male                             | 4          | 6           | 4           |
| Female                           | 4          | 4           | 3           |
| <b>Disease duration (months)</b> | N/A        | 41.32±15.37 | 46.12±12.66 |
| <b>Current therapy</b>           |            |             |             |
| 5-aminosalicylates               | N/A        | 3           | 2           |
| Immunosuppressants               | N/A        | 0           | N/A         |
| Biologics                        | N/A        | 0           | N/A         |
| Nutritional therapy              | N/A        | 6           | 4           |
| <b>Disease location (CD)#</b>    |            |             |             |
| L1                               | N/A        | 3           | N/A         |
| L2                               | N/A        | 3           | N/A         |
| L3                               | N/A        | 4           | N/A         |
| L4                               | N/A        | 0           | N/A         |
| <b>Disease location (UC)#</b>    |            |             |             |
| E1                               | N/A        | N/A         | 2           |
| E2                               | N/A        | N/A         | 5           |
| E3                               | N/A        | N/A         | 0           |

#According to the Montreal classification system.

**Supplementary Table 2. Primers for qRT-PCR and CHIP assay**

| <b>Primers for qRT-PCR</b> |                |                        |                        |
|----------------------------|----------------|------------------------|------------------------|
| <b>Genes</b>               | <b>Species</b> | <b>Forward Primer</b>  | <b>Reverse Primer</b>  |
| <i>Gapdh</i>               | Mouse          | GGTTGTCTCCTGCGACTTCA   | TGGTCCAGGGTTTCTTACTCC  |
| <i>Iil22</i>               | Mouse          | AACAGCAGGTCCAGTTCCCC   | GCTCCTGTCACATCAGCGGT   |
| <i>Aahr</i>                | Mouse          | TTGGTTGTGATGCCAAAGGGC  | CATGCGGATGTGGGATTCTGC  |
| <i>Hif1a</i>               | Mouse          | AGCTTCTGTTATGAGGCTCACC | TGACTTGATGTTTCATCGTCTC |
| <i>Tbx21</i>               | Mouse          | AGCAAGGACGGCGAATGTT    | GGGTGGACATATAAGCGGTTC  |
| <i>Gapdh</i>               | Human          | CAGGAGGCATTGCTGATGAT   | GAAGGCTGGGGCTCATT      |
| <i>Iil22</i>               | Human          | TGCTGTTCCCTCAATCTG     | TGTGCTTAGCCTGTTGCTG    |
| <i>Ahr</i>                 | Human          | CGTCTAAGGTGTCTGCTGGAT  | CAAGTATGGATGGTGGCTGAAG |
| <i>Hif1a</i>               | Human          | ACTAGCCGAGGAAGAACTATGA | CTGAGGTTGGTTACTGTTGGTA |
| <b>Primers for CHIP</b>    |                |                        |                        |
| <b>Name</b>                | <b>Species</b> | <b>Forward Primer</b>  | <b>Reverse Primer</b>  |
| <i>Iil22</i> (HRE)         | Mouse          | GGGAGAAAGATCTCACACAGT  | CAGACGCCTACCCTAGACT    |
